# Supplementary material
Source: PubMed Central journal article supplement (PMC2906273)

## Supplementary Information

**Table S1 Primer sequences used for qPCR assays**

|          |                                                                                  |
|----------|----------------------------------------------------------------------------------|
| Smurf1   | F, 5'-CTACCAGCGTTTGGATCTAT-3'<br>R, 5'-TGTCTCGGGTCTGTAAACT-3'                    |
| Smurf2   | F, 5'-ATGAGCAGGACACACTTACA-3'<br>R, 5'-CACCAGTCTGAGTATGTAAGA-3'                  |
| Puma     | F, 5'-GACCTCAACGCACAGTA-3'<br>R, 5'-CTAATTGGGCTCCATCT-3'                         |
| p53 AIP1 | F, 5'-TCTTCCTCTGAGGCGAGCT-3'<br>R, 5'-AGGTGTGTGTGTCTGAGCCC-3'                    |
| Noxa     | F, 5'-AGAGCTGGAAGTCGAGTGT-3'<br>R, 5'-GCACCTTCACATTCCTCTC-3'                     |
| P21      | F, 5'-CACCGAGACACCACTGGAGG-3'<br>R, 5'-GAGAAGATCAGCCGGCGTTT-3'                   |
| MDM2     | F, 5'-ATCTTGCCAGTATATTATG-3'<br>R, 5'-GTTCTGTAGATCATGGTAT-3'                     |
| P53      | F, 5'-GAGGGATGTTTGGGAGATGTAAGAAATG-3'<br>R, 5'-TTCACAGATATGGGCCTTGAAGTTAGAGAA-3' |
| NEDL1    | F, 5'-TCAACCCTTACTATGGACTCTT-3'<br>R, 5'-AGGATGCGACCGCTAAAC-3'                   |
| NEDL2    | F, 5'-TTGGGCAGATAACTGAACGA-3'<br>R, 5'-GCATCCACCACCTCATAGAA-3'                   |

Note: F: forward; R; reverse.

### Figure Legends

**Fig. S1 The effect of NEDLs on p53 activity.**

(A) Depletion of NEDL2 upregulates p53-dependent target genes. Total RNA from siRNA-transfected MCF7 cells was subjected to qPCR analysis. Data are presented as mean  $\pm$  s.d. ( $n=3$ ).

(B) Depletion of NEDL1 downregulates p53-dependent target genes. Total RNA from siRNA-transfected MCF7 cells was subjected to a qPCR analysis. Data are presented as mean  $\pm$  s.d. ( $n=3$ ).

# Figure S1

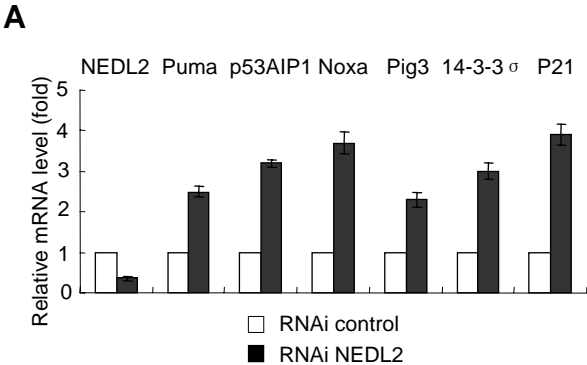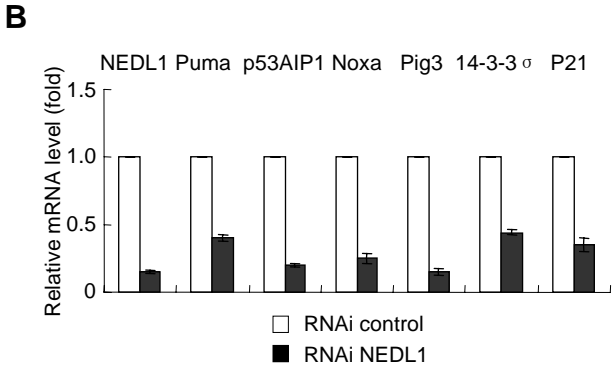

Supplement: supp_M110.126920_jbc.M110.126920-1.pdf [file supp_M110.126920_jbc.M110.126920-1.pdf]
